# Supplementary material for: Individualized neoantigen peptide immunization of a metastatic pancreatic cancer patient: a case report of combined tumor and liquid biopsy
Source: PubMed Central journal article supplement (PMC11208475; doi:10.3389/fimmu.2024.1414737), 2024-06-13
Supplement: DataSheet_1.pdf [file DataSheet_1.pdf]

## *Supplementary Material*

### 1 **1 Supplementary Data**

#### 2 1. Material and methods

##### 3 1.1 Next Generation Sequencing and Bioinformatics

4 Formalin-fixed paraffin-embedded (FFPE) tissue samples were used for whole exome and  
5 transcriptome sequencing. In that respect, after tissue sectioning and evaluation by pathologist, DNA  
6 and RNA were isolated from FFPE tumor blocks with at least 40% tumor cells (MagMax FFPE  
7 DNA/RNA Ultra; Thermo Fisher). DNA from PBMCs in peripheral blood was isolated (QIA  
8 Symphony DSP DNA Mini Kit 96, Qiagen) and considered as normal tissue. Additionally, for the  
9 liquid biopsy, three 10-mL peripheral blood samples were collected in Streck cell-free DNA tubes and  
10 used for cfDNA isolation (Suppl. Figure 1).

11 Library preparation for whole exome sequencing (WES) was performed using Twist Human Core  
12 Exome kit with RefSeq and Mitochondrial Panel (Twist Bioscience). Library preparation for RNA-seq  
13 was carried out by SMART-Seq Stranded Kit (Takara). The quality controls were performed by  
14 fluorescence-based quantification method and fragment length analysis. The DNA and RNA-seq  
15 libraries were sequenced on a NovaSeq 6000 using 2x100 bp paired end reads which resulted in about  
16 320 and 94 million reads, respectively.

17 Bioinformatic analysis was performed by our in-house BITAP pipeline. BITAP workflow is a  
18 computational tool divided in two steps. Firstly, in the analytical process, BITAP infers the somatic  
19 tumor mutations from the Whole Exome Sequencing (WES) of tumor and blood samples. The raw data  
20 will then be preprocessed, aligned and filtered (fastQC, skewer, BWA mem and samtools). The HLA  
21 typing, gene expression and gene fusions will be defined from bulk-tumor RNAseq. The somatic  
22 mutations are called and annotated with the VEP tool ([McLaren et al., 2016](#)). Gene fusion is obtained  
23 by star-fusion ([Haas et al., 2019](#)), ARIBA ([Uhrig et al., 2021](#)) and annoFuse tools ([Gaonkar et al.,  
24 2020](#)). BITAP workflow calculate gene expression in TPM through the RNAseq analysis after the  
25 alignment with STAR and expression calculation with RSEM ([Li & Dewey, 2011](#))

26 In the second step, which is the immune prediction step, The binding affinity is calculated for the  
27 peptides by MHCflurry and NetMHCIIpan ([Reynisson et al., 2020](#)) ([O'Donnell et al., 2018, 2020](#)) for  
28 HLA class I and class II, respectively. Physicochemical properties are calculated with Protparam, and  
29 finally the pMHC immunogenicity will be predicted by a machine learning model, and ranked  
30 according to our parameters.

##### 31 1.2 Peptide design and manufacturing

32 The peptides were then produced through chemical synthesis at >90% purity to generate the  
33 immunization peptide pool together with XS15 as an adjuvant. The immunization pool contains six  
34 different peptides encompassing single nucleotide variation (SNV) neoantigens, which were  
35 manufactured in the form of long peptide both with and without a delivery vector (Supplementary table  
36 1). The peptides include different epitopes; the single-epitope and multi-epitope peptides. The various  
37 epitopes within each peptide were connected using a standard cleavable linker (3-AA size).

### 38 1.3 Immunogenicity Testing using Interferon- $\gamma$ ELISPOT assay

39 The T-cell responses to the peptides were monitored in peripheral blood mononuclear cells (PBMCs)  
40 isolated from blood drawn before vaccination (data not shown) and after the priming phase  
41 (Supplemental figure 2). The ELISPOT technology allows to determine the number of cells that  
42 produce a certain cytokine (here IFN $\gamma$ ) with high sensitivity. Such analyses can be performed directly  
43 ex vivo or after a pre-stimulation of the cells in vitro.

44 In Ex Vivo ELISPOT, immune cells are isolated directly from the individuals, typically peripheral  
45 blood, and are not cultured or stimulated in vitro prior to the assay. The isolated PBMCs are directly  
46 plated onto ELISPOT plates coated with capture antibodies. The cells are incubated in presence of the  
47 respective peptide, allowing any antigen-specific immune responses to be captured and detected by the  
48 ELISPOT assay (2). Ex vivo ELISPOT assays reflect the immune response present in the individual at  
49 the time of sample collection and thus provide information about the ongoing immune response. To  
50 increase the sensitivity of the assay, the cells can be prestimulated in vitro, resulting in an expansion  
51 of the specific T cells. This further increases the sensitivity, but reduces the accuracy of the assay.

52 The ELISPOT assays were performed as described elsewhere (1): to determine the frequencies of  
53 specific T cells in the blood of the patient, PBMCs were isolated from 50 ml of patient blood by  
54 lymphoprep (Axis-Shield PoC AS) density gradient centrifugation. The purified cells were either used  
55 directly (ex vivo) for the ELISPOT, or were in vitro stimulated (IVS) with a pool of the peptides at a  
56 concentration of 200 nM each in T-cell medium (1) in presence of IL-2 and IL-7 for 15 days. Anti-  
57 IFN $\gamma$ -coated 96-well ELISPOT plates (Mabtech, Hamburg, Germany) were used according to  
58 manufacturer's instructions. PBMCs were seeded at a density of  $2 \times 10^5$  per well, and stimulated with  
59 the individual peptides at concentrations of 2  $\mu$ M, 200 nM, and 20 nM. After 20 h of incubation at  
60 37°C, the ELISpot plates were washed and stained with horseradish peroxidase (HRP)-conjugated anti-  
61 IFN $\gamma$  antibody. All tests were performed in duplicate and included negative (No peptide) and positive  
62 controls (20 ng/ml SEA and 5  $\mu$ g/mL PHA-L). ELISpot assays were evaluated using the Zeiss ELISpot  
63 Reader and the KS ELISpot 4.13.0 software. The responses were considered positive when the numbers  
64 of IFN- $\gamma$ -secreting cells were at least 2-fold above the negative control. The results revealed high  
65 immunogenicity of the peptides: After IVT, all peptides but peptide 1 showed strong responses,  
66 partially even exceeding the maximum detection limit of the assay. Of note is that the peptides were  
67 recognized even at low concentrations of 20 nM, indicating a high functional avidity of the T cells.  
68 (Supplemental figure 2A). Even without prestimulation, the ELISPOT showed detectable numbers of  
69 specific T cells ex vivo, with peptide 5 and 6 again showing high avidity responses.

70

## 71 2 Supplementary Figures and Tables

72 2.1 Supplementary Figures

73

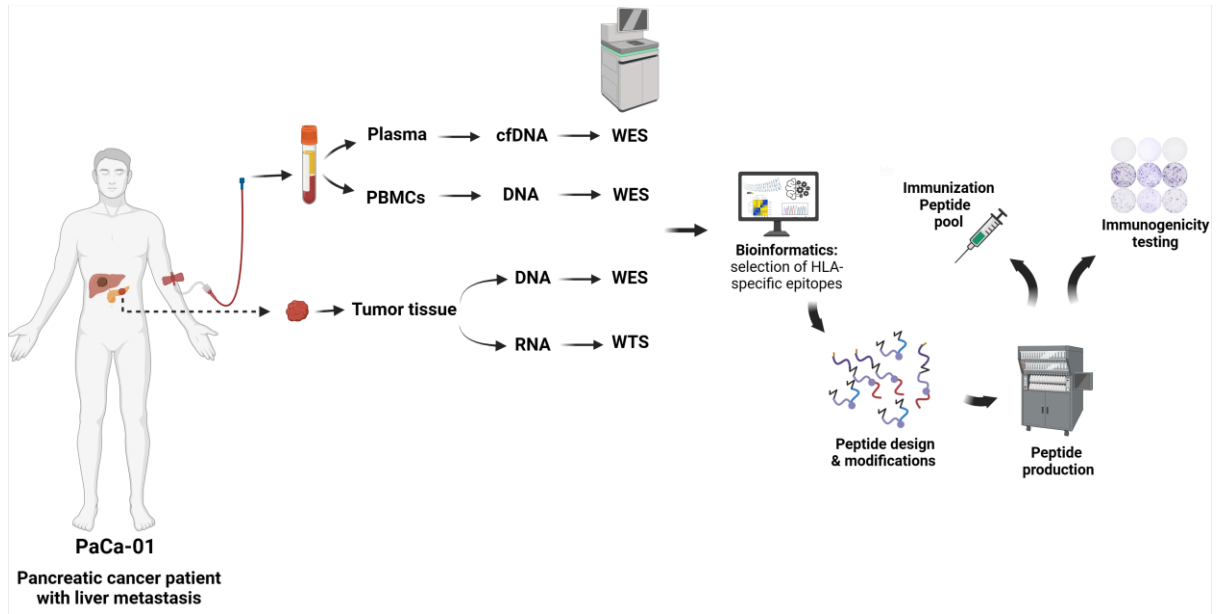

74

75 **Supplementary Figure 1.** Workflow of immunization peptide pool preparation from patient  
76 materials, and molecular analysis to the personalized immunogenic peptide pool.

77

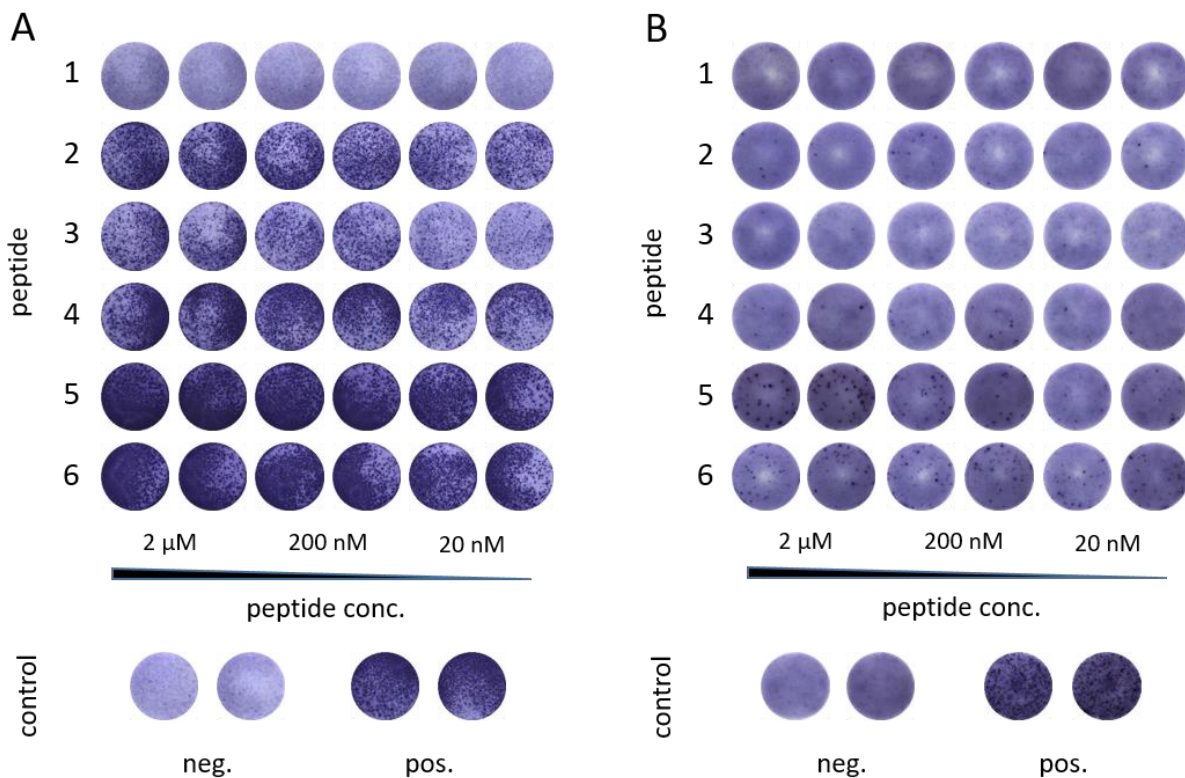

78

79

80 **Supplementary figure 2:** Peptide-specific immune responses after immunization. PBMCs were isolated after  
 81 the priming phase of the treatment and were analysed for reactivity to the vaccination peptides depicted in  
 82 Supplemental table 1. PBMCs were either prestimulated for 15 days with a pool of all peptides at 200 nM each  
 83 (A) or were used directly *ex vivo* (B). In an IFN $\gamma$ -ELISPOt-assay, 200.000 cells per well were stimulated with  
 84 each individual peptide at concentrations of 2  $\mu$ M, 200 nM and 20 nM in duplicate. Stimulations without peptide  
 85 (neg.) and with SEA and PHA-L (pos.) served as controls.

86

87 **Supplementary table 1:** list of manufactured peptides (BITAP-1)

| ID         | Peptide                                     | Gene/s              | Antigen Type | AA change       |
|------------|---------------------------------------------|---------------------|--------------|-----------------|
| Peptide-01 | KLVVVGAVGVGKSALTI                           | KRAS                | TSA: SNV     | G12V            |
| Peptide-02 | KLVVVGAVGVGKSALTIRQIKIWFQ<br>NRRMKWKK       | KRAS                | TSA: SNV     | G12V            |
| Peptide-03 | LANSPLSHLAYVYVTKVKEEDAF                     | ADAM<br>8-<br>NUP50 | TSA: SNV     | A399S-<br>E351K |
| Peptide-04 | LANSPLSHLAYVYVTKVKEEDAFRQI<br>KIWFQNRRMKWKK | ADAM<br>8-<br>NUP50 | TSA: SNV     | A399S-<br>E351K |
| Peptide-05 | LQEFRRFQDPGRIVAIV                           | CEMIP<br>2          | TSA: SNV     | L301R           |
| Peptide-06 | LQEFRRFQDPGRIVAIVRQIKIWFQNR<br>RMKWKK       | CEMIP<br>2          | TSA: SNV     | L301R           |

88

89

## 90 References

- 91 1. Gerer KF, Erdmann M, Hadrup SR, Lyngaa R, Martin LM, Voll RE, et al. Preclinical  
 92 evaluation of NF- $\kappa$ B-triggered dendritic cells expressing the viral oncogenic driver of Merkel cell  
 93 carcinoma for therapeutic vaccination. *Ther Adv Med Oncol.* 2017 Jul;9(7):451–64.
- 94 2. Sedegah M. The Ex Vivo IFN- $\gamma$  Enzyme-Linked Immunospot (ELISpot) Assay. *Methods*  
 95 *Mol Biol Clifton NJ.* 2015;1325:197–205.

96
